# Supplementary material for: Melatonin and calcium phosphate crystal-loaded poly(l-lactic acid) porous microspheres reprogram macrophages to improve bone repair
Source: Royal Society of Chemistry journal article supplement (doi:10.1039/d3tb02965d), 2024-01-01
Supplement: d3tb02965d1.pdf [file d3tb02965d1.pdf]

# Supplementary Materials for

## **Melatonin and Calcium Phosphate Crystal-loaded Poly(L-lactic acid) Porous Microspheres Reprogram Macrophages to Improve Bone Repair**

### **Authors**

Yiyang Huang <sup>a,†</sup>, Yichang Xu <sup>a,†</sup>, Ziyang Huang <sup>a,†</sup>, Jiannan Mao <sup>a,b,†</sup>, Yujian Hui <sup>a,b</sup>, Min Rui <sup>a,b</sup>, Xinzhao Jiang <sup>a</sup>, Jie Wu <sup>a</sup>, Zhouye Ding <sup>a</sup>, Yu Feng <sup>a,\*</sup>, Yong Gu <sup>a,\*</sup> and Liang Chen <sup>a,\*</sup>

### **Affiliations**

<sup>a</sup>Department of Orthopedics, The First Affiliated Hospital of Soochow University, Orthopedic Institute, Soochow University, 188 Shizi Road, Suzhou, Jiangsu, 215006, PR China

<sup>b</sup>Department of Orthopaedics, Jiangyin Clinical College, Xuzhou Medical University, No.163 Shoushan Road, Jiang Yin 214400, China

\*Correspondence: [fengyu@suda.edu.cn](mailto:fengyu@suda.edu.cn), [guyong1019@suda.edu.cn](mailto:guyong1019@suda.edu.cn),  
[chenliang7737@suda.edu.cn](mailto:chenliang7737@suda.edu.cn)

† These authors contributed equally to the work.

### **This file includes:**

Figures S1. to S6.

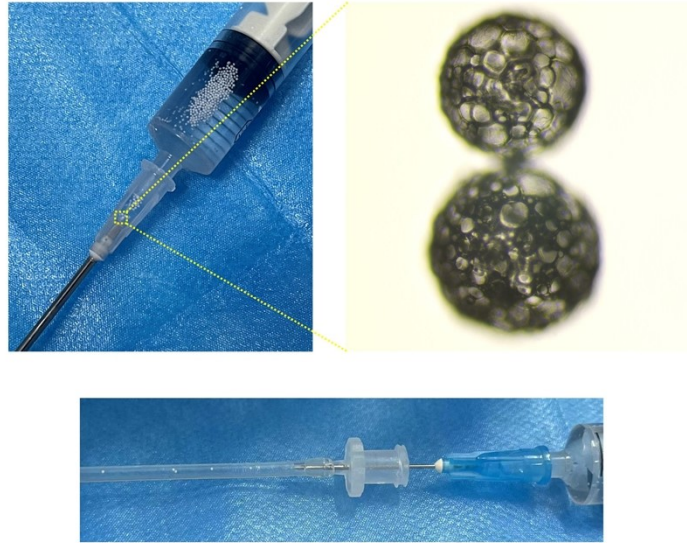

**Figure S1. Image of microsphere injection**

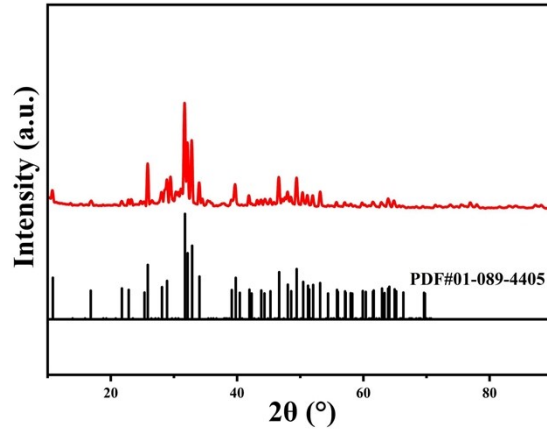

**Figure S2. XRD image of calcium phosphate crystals**

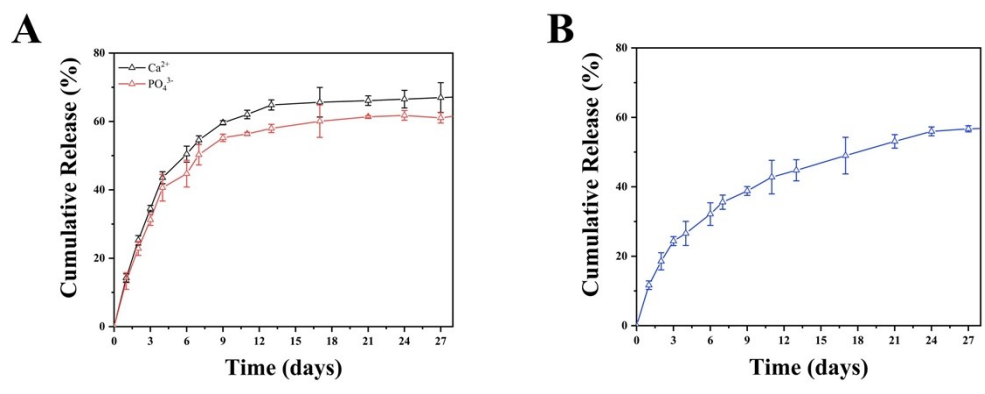

**Figure S3. Release of substance from microspheres. (A)** Release curve of calcium ions and phosphate ions. **(B)** Release curve of melatonin.

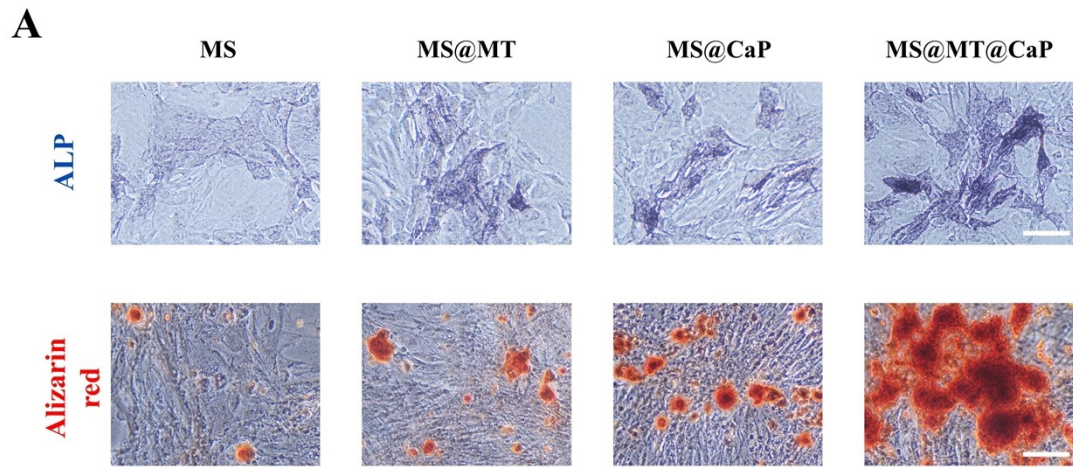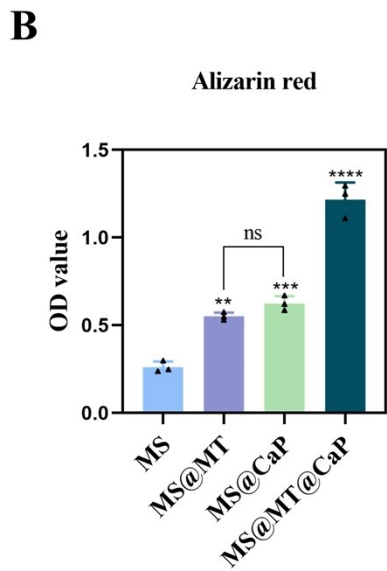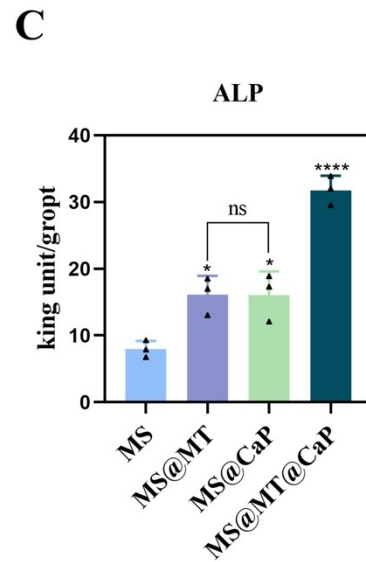

**Figure S4.** (A) Images of ALP and Alizarin red staining (scale bar = 100  $\mu$ m). (B) Quantitative analysis of ALP staining (n = 4). (C) Quantitative analysis of calcium nodule content.

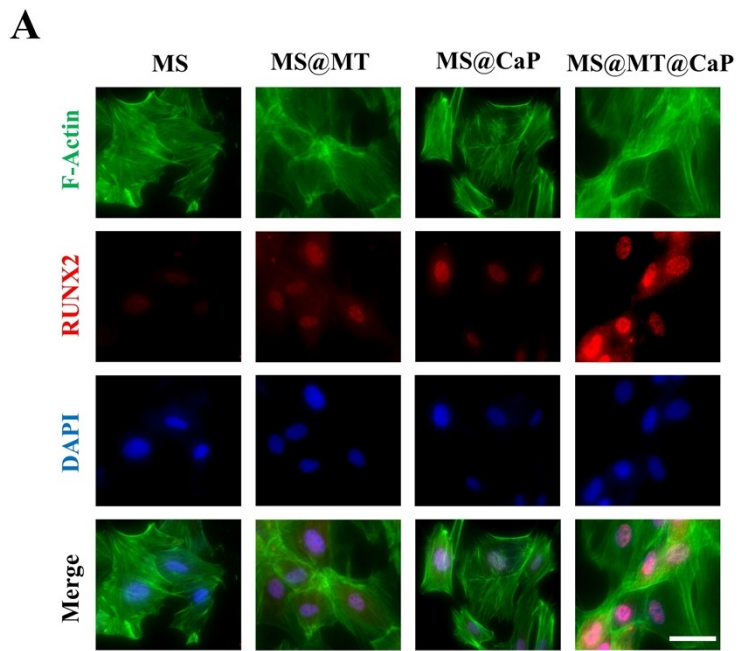

**B**

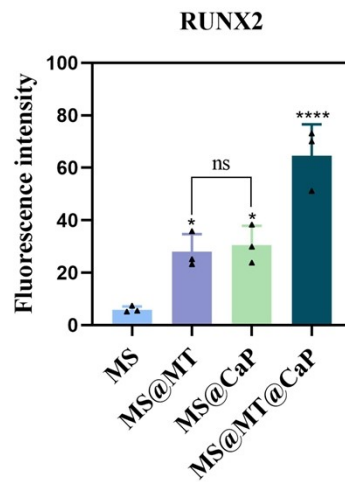

**Figure S5. (A)** RUNX2 immunofluorescence staining (scale bar = 50  $\mu$ m). **(B)** Semi-quantitative analysis of the intensity of RUNX2 immunofluorescence staining (n = 4).

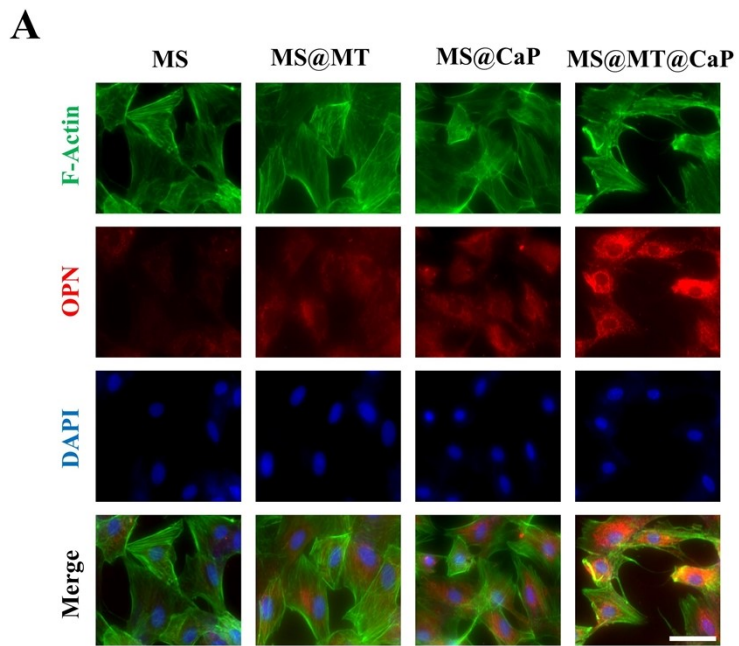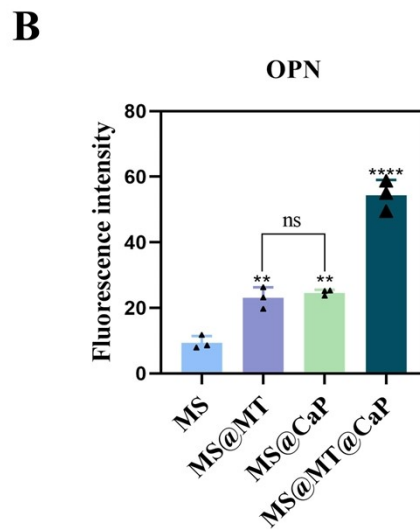

**Figure S6.** (A) OPN immunofluorescence staining (scale bar = 50  $\mu$ m). (B) Semi-quantitative analysis of the intensity of OPN immunofluorescence staining.
